# Supplementary figures and images for: Application of a Novel Au@ZIF-8 Composite in the Detection of Bisphenol A by Surface-Enhanced Raman Spectroscopy
Source: MDPI journal article supplement (doi:10.3390/foods12040813), 2023-02-14

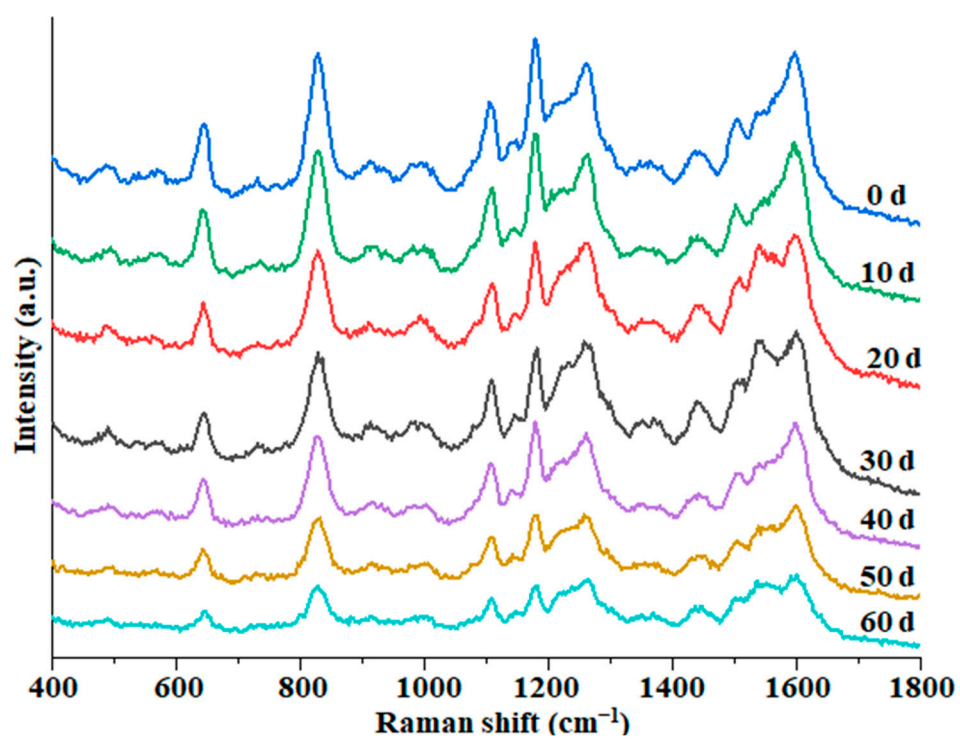

Figure S1. Effect of Au@ZIF-8 on enhancing Raman spectrum signal of BPA with its storage time.

Supplement: s1 [file s1]
